# Supplementary material
Source: publisher site journal article supplement (https://www.dovepress.com/article/598774)
Supplement: Supplementary file 1 [file 598774%20Revised%20Supplemental%20Figure%201.docx]

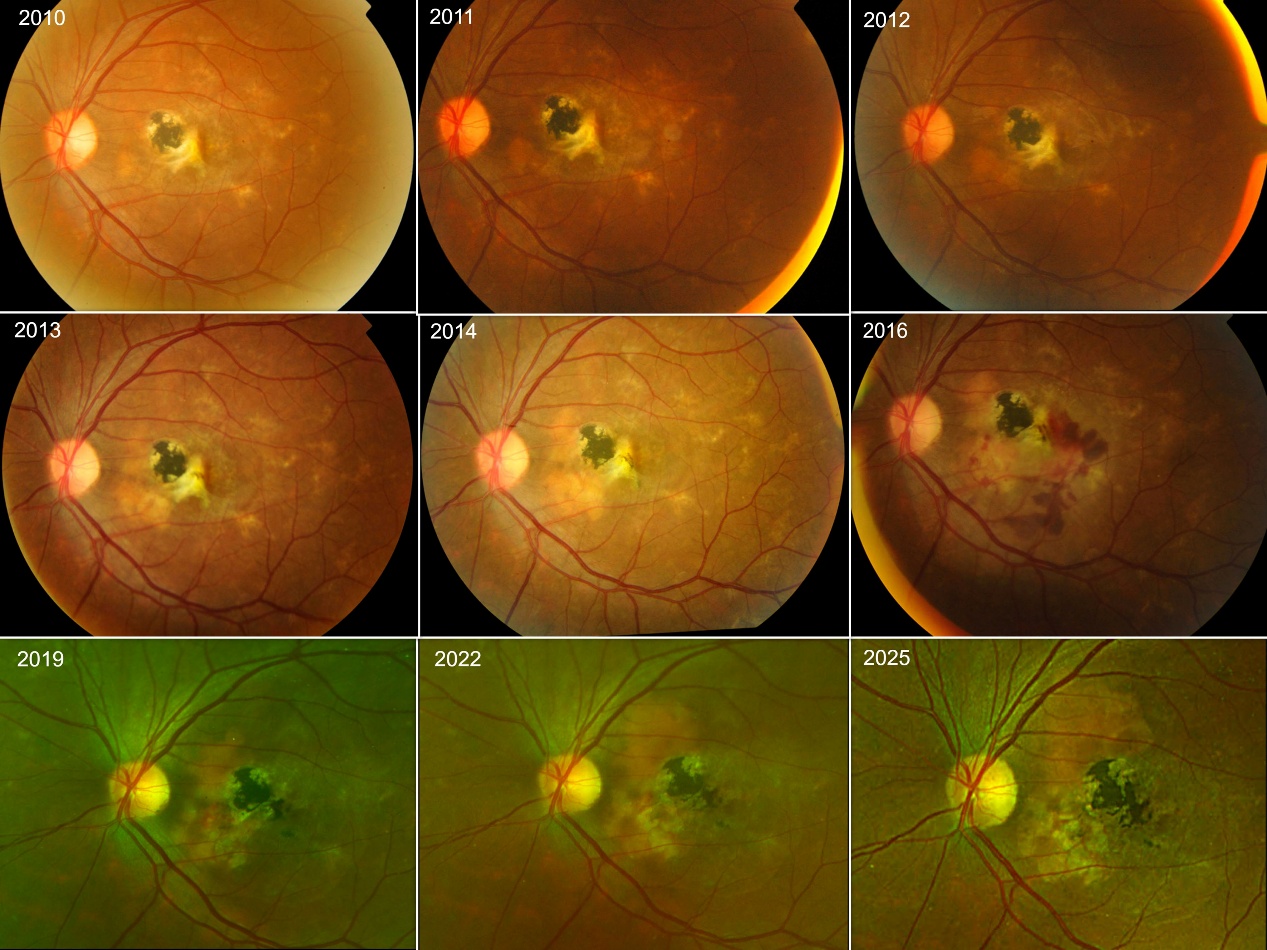


Supplemental figure 1: The serial examinations of the left eye throughout the follow-up duration from 2010 to 2025.
